# Supplementary material
Source: Springer Nature journal article supplement (https://www.springermedizin.de/resource/supplementary/12939_2012_350_MOESM5_ESM.pdf/9550956)

**Intervention**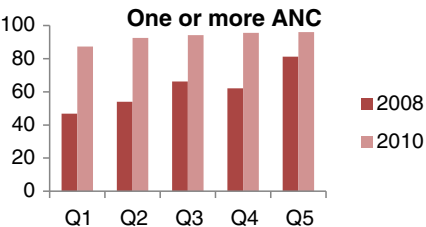**Comparison**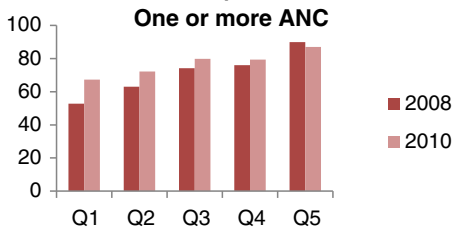**Mean number of ANC visit**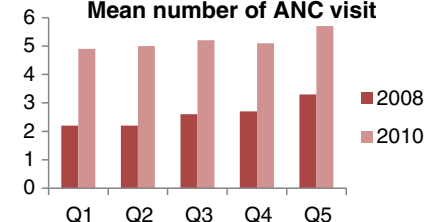**Mean number of ANC visit**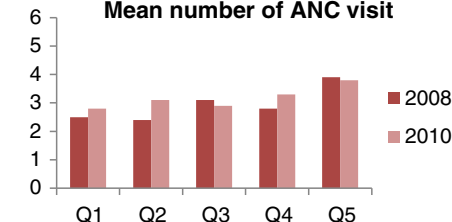**ANC by medically trained provider\***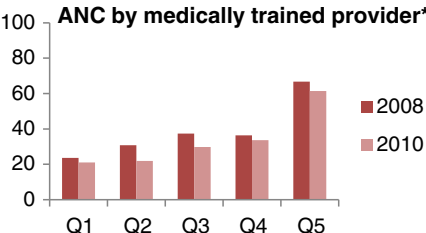**ANC by medically trained provider\***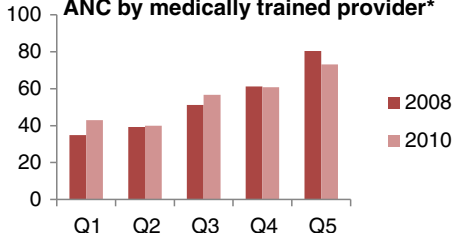**ANC by trained provider\*\***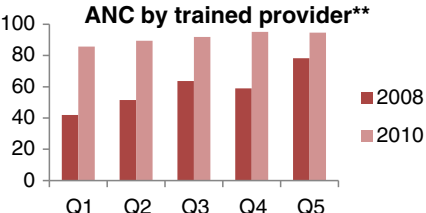**ANC by trained provider\*\***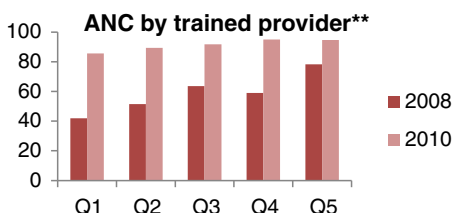**PNC within 48 hours**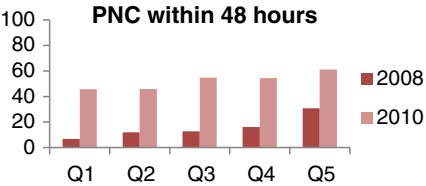**PNC within 48 hours**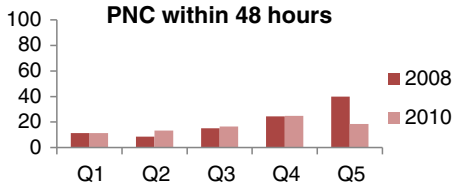

Supplement: MOESM5 [file 9550956]
